# Supplementary material
Source: HighWire-hosted journal article supplement (https://www.annfammed.org/highwire/filestream/8231/field_highwire_adjunct_files/0/Salisbury_Supp_Tables1-3.pdf)
Supplement: Salisbury_Supp_Tables1-3.pdf [file Salisbury_Supp_Tables1-3.pdf]

**Online Supplementary Material**

Huntley AL, Johnson R, Purdy S, Valderas JM, Salisbury C. Measures of multimorbidity and morbidity burden for use in primary care and community settings: a systematic review and guide. *Ann Fam Med.* 2012;10(2):134-141.

<http://www.annfammed.org/content/10/2/134>

**Supplemental Table 1. Index of Studies With Demonstrated Associations Between Patient Sociodemographic Characteristics and Multimorbidity or Morbidity Burden Using Different Measures**

| Outcome and Anticipated Association                                                                                                                  | Measure                                                                                                                                     |                                                                                                                                                   |            |                   |                             |                                                                                         |                          |
|------------------------------------------------------------------------------------------------------------------------------------------------------|---------------------------------------------------------------------------------------------------------------------------------------------|---------------------------------------------------------------------------------------------------------------------------------------------------|------------|-------------------|-----------------------------|-----------------------------------------------------------------------------------------|--------------------------|
|                                                                                                                                                      | Self-Reported Disease Counts                                                                                                                | Clinician-Rated Disease Counts                                                                                                                    | CDS/RxRisk | Charlson Index    | ACG                         | CIRS                                                                                    | DUSOI                    |
| <b>Age</b>                                                                                                                                           |                                                                                                                                             |                                                                                                                                                   |            |                   |                             |                                                                                         |                          |
| Increased multimorbidity with increasing age                                                                                                         | Age <sup>1-3</sup><br>Age (not associated) <sup>4</sup>                                                                                     | Age <sup>5-12</sup>                                                                                                                               | –          | Age <sup>13</sup> | Age <sup>7,14-16</sup>      | Age <sup>7,17-20</sup>                                                                  | Age <sup>21</sup>        |
| <b>Sex</b>                                                                                                                                           |                                                                                                                                             |                                                                                                                                                   |            |                   |                             |                                                                                         |                          |
| Increased multimorbidity in females                                                                                                                  | Female sex <sup>3,22-24</sup><br>Sex (not associated) <sup>24</sup>                                                                         | Female sex <sup>12,25</sup><br>Sex (not associated) <sup>26,27</sup>                                                                              | –          | –                 | Female sex <sup>14,28</sup> | Female sex <sup>20</sup><br>Association with sex unclear <sup>18</sup>                  | Female sex <sup>21</sup> |
| <b>Deprivation</b>                                                                                                                                   |                                                                                                                                             |                                                                                                                                                   |            |                   |                             |                                                                                         |                          |
| Increased multimorbidity with less affluence, less education, lower social class                                                                     | Household income <sup>22</sup><br>Deprivation <sup>29</sup><br>Socioeconomic status <sup>1</sup><br>Education, social class <sup>2,30</sup> | Deprivation <sup>4,8</sup><br>Public rather than private health insurance <sup>25</sup><br>Education <sup>10,25</sup><br>Occupation <sup>31</sup> | –          | –                 | –                           | Household income <sup>20</sup><br>Unemployment <sup>20</sup><br>Education <sup>20</sup> | –<br>–                   |
| <b>Living arrangements</b>                                                                                                                           |                                                                                                                                             |                                                                                                                                                   |            |                   |                             |                                                                                         |                          |
| Increased multimorbidity in those living alone or in institution                                                                                     | Living alone or in an institution <sup>1,3</sup><br>Marital status (not associated) <sup>32</sup>                                           | Living alone or in an institution <sup>25,33</sup><br>Living as a couple/family <sup>34</sup><br>Having a large social network <sup>31,34</sup>   | –          | –                 | –                           | –                                                                                       | –                        |
| Note: In each case, studies have demonstrated associations between the measure and the outcome in the anticipated direction, except where specified. |                                                                                                                                             |                                                                                                                                                   |            |                   |                             |                                                                                         |                          |

**Supplemental Table 2. Index of Studies Which Have Demonstrated Relationships Between Multimorbidity or Morbidity Burden and Cost or Process of Care Using Different Measures**

| Outcome and Anticipated Relationship                            | Measure                                                                                                                                                            |                                                                                                                                                         |                                                                                                                                                                                                      |                                                                                                                                                                                                                                                                                              |                                                                                                                                                                                                                                                                                                                                                     |      |                                                                                 |
|-----------------------------------------------------------------|--------------------------------------------------------------------------------------------------------------------------------------------------------------------|---------------------------------------------------------------------------------------------------------------------------------------------------------|------------------------------------------------------------------------------------------------------------------------------------------------------------------------------------------------------|----------------------------------------------------------------------------------------------------------------------------------------------------------------------------------------------------------------------------------------------------------------------------------------------|-----------------------------------------------------------------------------------------------------------------------------------------------------------------------------------------------------------------------------------------------------------------------------------------------------------------------------------------------------|------|---------------------------------------------------------------------------------|
|                                                                 | Self-Reported Disease Counts                                                                                                                                       | Clinician-Rated Disease Counts                                                                                                                          | CDS/RxRisk                                                                                                                                                                                           | Charlson Index                                                                                                                                                                                                                                                                               | ACG                                                                                                                                                                                                                                                                                                                                                 | CIRS | DUSOI                                                                           |
| <b>Costs of providing care</b>                                  |                                                                                                                                                                    |                                                                                                                                                         |                                                                                                                                                                                                      |                                                                                                                                                                                                                                                                                              |                                                                                                                                                                                                                                                                                                                                                     |      |                                                                                 |
| Increased costs with increased multimorbidity                   | –                                                                                                                                                                  | Medication costs <sup>35,36</sup><br>Annual costs <sup>10</sup><br>Meeting treatment targets (pay for performance) <sup>37</sup>                        | Health costs <sup>38-40</sup>                                                                                                                                                                        | Annual costs in ambulatory care <sup>41-42</sup><br>Total costs <sup>38</sup>                                                                                                                                                                                                                | Physician costs <sup>32</sup><br>Total costs <sup>40,43,44</sup><br>Primary care costs <sup>45,46</sup><br>Medication costs <sup>18,47</sup><br>Polypharmacy <sup>48</sup>                                                                                                                                                                          | –    | Total costs <sup>43,49</sup><br>Health care charges (not related) <sup>21</sup> |
| <b>Patient costs</b>                                            |                                                                                                                                                                    |                                                                                                                                                         |                                                                                                                                                                                                      |                                                                                                                                                                                                                                                                                              |                                                                                                                                                                                                                                                                                                                                                     |      |                                                                                 |
| Increased costs with increased multimorbidity                   | –                                                                                                                                                                  | Out of pocket expenses <sup>18</sup>                                                                                                                    | –                                                                                                                                                                                                    | –                                                                                                                                                                                                                                                                                            | Health plan expenditure <sup>14,16</sup><br>Patient costs <sup>28,32,50-52</sup>                                                                                                                                                                                                                                                                    | –    | –                                                                               |
| <b>Process measures</b>                                         |                                                                                                                                                                    |                                                                                                                                                         |                                                                                                                                                                                                      |                                                                                                                                                                                                                                                                                              |                                                                                                                                                                                                                                                                                                                                                     |      |                                                                                 |
| Increased health care utilization with increased multimorbidity | Number of ambulatory visits <sup>53-56</sup><br>Health care utilization <sup>57</sup><br>Number of prescriptions <sup>54,56</sup><br>Number of tests <sup>54</sup> | Number of ambulatory visits <sup>38,58,59-61</sup><br>Number of prescriptions <sup>61</sup><br>Number of specialists referrals/visits <sup>6</sup><br>1 | Health care utilization <sup>39,62</sup><br>Hospitalization <sup>39,63-65</sup><br>Institutionalization <sup>63</sup><br>Ambulatory visits <sup>38,62</sup><br>Number of prescriptions <sup>62</sup> | Number of ambulatory visits <sup>38,62</sup><br>Hospital admission rates <sup>62,63,66,67</sup><br>Number of prescriptions <sup>62,68</sup><br>Institutionalization <sup>63</sup><br>Screening rates for cancer <sup>69,70</sup><br>Fecal occult blood testing (not related) <sup>71,3</sup> | Hospital admission rates <sup>14,16,72</sup><br>Number of home visits <sup>73</sup><br>Number of specialist referrals/visits <sup>6,74,75</sup><br>Number of referrals in and between practices <sup>76</sup><br>Number of ambulatory visits <sup>44,50,72,74,75,77</sup><br>Number of prescriptions <sup>72</sup><br>Number of tests <sup>72</sup> | –    | –                                                                               |
| <b>Quality of care measures</b>                                 |                                                                                                                                                                    |                                                                                                                                                         |                                                                                                                                                                                                      |                                                                                                                                                                                                                                                                                              |                                                                                                                                                                                                                                                                                                                                                     |      |                                                                                 |
|                                                                 | –                                                                                                                                                                  | Quality of care <sup>78,79</sup><br>Co-ordination of care (CPCI) <sup>80,81</sup>                                                                       | –                                                                                                                                                                                                    | Quality of care <sup>82</sup><br>Odds of reaching targets of uric acid <sup>82</sup>                                                                                                                                                                                                         | –                                                                                                                                                                                                                                                                                                                                                   | –    | –                                                                               |

In each case, studies have demonstrated relationships between the measure and the outcome in the anticipated direction, except where specified.

**Supplemental Table 3. Index of Studies Which Have Demonstrated Relationships Between Multimorbidity or Morbidity Burden and Patient Health Outcomes Using Different Measures**

| Outcome and Anticipated Relationship                            | Measure                                                                                                                                                                                                                                                                                                                                                                                                                                                                                                                                            |                                                                                                                                                    |                                                                                                                                                            |                                                                                                                    |                           |                                                                                                                          |                                 |
|-----------------------------------------------------------------|----------------------------------------------------------------------------------------------------------------------------------------------------------------------------------------------------------------------------------------------------------------------------------------------------------------------------------------------------------------------------------------------------------------------------------------------------------------------------------------------------------------------------------------------------|----------------------------------------------------------------------------------------------------------------------------------------------------|------------------------------------------------------------------------------------------------------------------------------------------------------------|--------------------------------------------------------------------------------------------------------------------|---------------------------|--------------------------------------------------------------------------------------------------------------------------|---------------------------------|
|                                                                 | Self-Reported Disease Counts                                                                                                                                                                                                                                                                                                                                                                                                                                                                                                                       | Clinician-Rated Disease Counts                                                                                                                     | CDS/RxRisk                                                                                                                                                 | Charlson Index                                                                                                     | ACG                       | CIRS                                                                                                                     | DUSOI                           |
| <b>Mortality</b>                                                |                                                                                                                                                                                                                                                                                                                                                                                                                                                                                                                                                    |                                                                                                                                                    |                                                                                                                                                            |                                                                                                                    |                           |                                                                                                                          |                                 |
| Increased mortality with increased multimorbidity               | Mortality <sup>25,83-85</sup>                                                                                                                                                                                                                                                                                                                                                                                                                                                                                                                      | Mortality <sup>38,58,86-88</sup>                                                                                                                   | Mortality <sup>38,39,63,86,87,89</sup>                                                                                                                     | Mortality <sup>38,63,67,71,86,87,90-93</sup>                                                                       | —                         | —                                                                                                                        | —                               |
| <b>Physical functioning</b>                                     |                                                                                                                                                                                                                                                                                                                                                                                                                                                                                                                                                    |                                                                                                                                                    |                                                                                                                                                            |                                                                                                                    |                           |                                                                                                                          |                                 |
| Reduced physical function with increased multimorbidity         | Disability severity <sup>23,68,94-96</sup><br>Development of disability <sup>97</sup><br>Number of disability days <sup>98</sup><br>Physical /functional abilities <sup>23,99,100</sup><br>Daily functioning <sup>30,101</sup><br>Fitness (ability to do exercise) <sup>102</sup><br>Fragility <sup>103</sup><br>More falls <sup>104,105</sup><br>Dizziness <sup>105</sup><br>Pain <sup>106</sup><br>Increased BMI, waist circumference <sup>107</sup><br>Visual impairment <sup>108</sup>                                                         | Disability <sup>86,108,110</sup><br>Obesity <sup>8</sup><br>Previous alcohol and tobacco use <sup>8</sup><br>Previous hospitalization <sup>8</sup> | Incident disability <sup>86,111</sup><br>Disease severity <sup>64</sup><br>Disability status <sup>64</sup>                                                 | Incident disability <sup>86</sup>                                                                                  | —                         | GI symptoms (depression patients) <sup>20</sup><br>Disability <sup>112</sup>                                             | —                               |
| <b>Psychological functioning</b>                                |                                                                                                                                                                                                                                                                                                                                                                                                                                                                                                                                                    |                                                                                                                                                    |                                                                                                                                                            |                                                                                                                    |                           |                                                                                                                          |                                 |
| Reduced psychological functioning with increased multimorbidity | Decreased cognition (older people) <sup>113</sup><br>Dementia/cognitive impairment <sup>114</sup><br>Depression <sup>115-118</sup><br>Anxiety, (lack of) mastery <sup>119</sup><br>Depressive symptoms (not related) <sup>120,121</sup><br>Psychological distress <sup>1,120,122</sup><br>Use of psychotropic medication <sup>122</sup><br>Emotional contentment and happiness (positive affect) <sup>99</sup><br>Dissatisfaction, unhappiness, feeling terrible <sup>1</sup><br>Self-rated sleep quality & risk of sleep disorders <sup>123</sup> | Bipolar disorder <sup>124</sup><br>Psychological distress (not related) <sup>125</sup><br>Response to a depression program <sup>126</sup>          | Presence of dementia <sup>127</sup><br>Depression <sup>115</sup><br>Depression & anxiety (not related) <sup>64</sup><br>Psychiatric illness <sup>111</sup> | Depression <sup>119,128</sup><br>Somatization <sup>129,130</sup><br>Presence of Alzheimer's disease <sup>131</sup> | Depression <sup>132</sup> | Depression <sup>1</sup><br>Duration of depression <sup>n21</sup><br>Somatic symptoms (depression patients) <sup>86</sup> | Depression <sup>11,21,134</sup> |

Supplemental Table 3, continued

| Outcome and Anticipated Relationship                                                                                                                                    | Measure                                                                                                                                                                                                                                                                                                                                                                                                                                                                                                                                    |                                                                                                                                                                                                                                                                 |                                                                                                                             |                                                                                                                                                                                                                                                        |                                          |                                        |                                     |
|-------------------------------------------------------------------------------------------------------------------------------------------------------------------------|--------------------------------------------------------------------------------------------------------------------------------------------------------------------------------------------------------------------------------------------------------------------------------------------------------------------------------------------------------------------------------------------------------------------------------------------------------------------------------------------------------------------------------------------|-----------------------------------------------------------------------------------------------------------------------------------------------------------------------------------------------------------------------------------------------------------------|-----------------------------------------------------------------------------------------------------------------------------|--------------------------------------------------------------------------------------------------------------------------------------------------------------------------------------------------------------------------------------------------------|------------------------------------------|----------------------------------------|-------------------------------------|
|                                                                                                                                                                         | Self-Reported Disease Counts                                                                                                                                                                                                                                                                                                                                                                                                                                                                                                               | Clinician-Rated Disease Counts                                                                                                                                                                                                                                  | CDS/RxRisk                                                                                                                  | Charlson Index                                                                                                                                                                                                                                         | ACG                                      | CIRS                                   | DUSOI                               |
| <b>HRQoL / health status</b>                                                                                                                                            |                                                                                                                                                                                                                                                                                                                                                                                                                                                                                                                                            |                                                                                                                                                                                                                                                                 |                                                                                                                             |                                                                                                                                                                                                                                                        |                                          |                                        |                                     |
| Reduced HRQoL with increased multimorbidity                                                                                                                             | HRQoL (SF36) <sup>3,30,120,135-144</sup><br>HRQoL (self-assessed) <sup>145</sup><br>HRQoL with cancer (EORTC) <sup>146</sup><br>Psychological wellbeing <sup>146</sup><br>Health Utility Index <sup>147</sup><br>Perceived health status <sup>22,148-150</sup><br>Self-rated health <sup>1</sup>                                                                                                                                                                                                                                           | HRQoL PCS (SF-12 or SF-36) <sup>58,80,81,125,151-153</sup><br>HRQoL-MCS (SF-12 or 36) <sup>67,80</sup><br>HRQoL MCS (SF-36) (not related) <sup>125</sup><br>HRQoL (NHP) <sup>27</sup><br>Perceived health status <sup>154</sup><br>Health status <sup>155</sup> | HRQoL <sup>135,137</sup><br>Self-rated health <sup>64,148</sup><br>Health status <sup>64,149</sup>                          | HRQoL as measured by SF-36 PCS & MCS <sup>13,135,138,149,156,157</sup><br>Daily living QoL in breast cancer patients <sup>158</sup><br>SF-36-PCS but not MCS <sup>18</sup><br>Self-rated health <sup>13,159</sup><br>Self-care behavior <sup>160</sup> | –                                        | HRQoL (SF-36) PCS & MCS <sup>125</sup> | HRQoL SF-36 PCS & MCS <sup>11</sup> |
| <b>Other patient-related outcomes</b>                                                                                                                                   |                                                                                                                                                                                                                                                                                                                                                                                                                                                                                                                                            |                                                                                                                                                                                                                                                                 |                                                                                                                             |                                                                                                                                                                                                                                                        |                                          |                                        |                                     |
| Lower patient's self-management/ self-care behaviors <sup>160,161</sup><br>Increased worries about health <sup>22</sup><br>Increased prevalence of smoking <sup>2</sup> | Increased health care hassles <sup>81</sup><br>Communication (not related) <sup>80</sup><br>Increased preference for own health provider <sup>80,81</sup><br>Increased willingness to see non-physician provider <sup>80</sup><br>Lower self-management skills <sup>80</sup><br>Low internal locus of belief <sup>34</sup><br>Increased use of complementary & alternative therapies <sup>162</sup><br>Absence of positive life events <sup>31</sup><br>Poor social support <sup>163</sup><br>Absence of active coping style <sup>31</sup> | Not related to response to depression treatment <sup>126</sup>                                                                                                                                                                                                  | Increased self-reported/ occurrence of adverse events <sup>164,165</sup><br>Lower functional health literacy <sup>156</sup> | Decreased patient satisfaction <sup>15</sup>                                                                                                                                                                                                           | Inadequate social support <sup>163</sup> | –                                      |                                     |

BMI = body mass Index; CPCI = components of primary care Index; EORTC = European Organization for Research and Treatment of Cancer; GI = gastrointestinal; HRQL = health-related quality of life; SF-12/36 = 12-item and 36-item short form; PCS = physical component score; MCS = mental component score; NHP = Nottingham Health Profile.

Note: In each case, studies have demonstrated relationships between the measure and the outcome in the anticipated direction, except where specified.

**References**

1. Walker AE. Multiple chronic diseases and quality of life: patterns emerging from a large national sample, Australia. *Chronic Illn.* 2007; 3(3):202-218.
2. Heyworth IT, Hazell ML, Linehan MF, Frank TL. How do common chronic conditions affect health-related quality of life? *Br J Gen Pract.* 2009;59(568):e353-e358.
3. Lee PG, Cigolle C, Blaum C. The co-occurrence of chronic diseases and geriatric syndromes: the health and retirement study. *J Am Geriatr Soc.* 2009;57(3):511-516.
4. Macleod U, Mitchell E, Black M, Spence G. Comorbidity and socioeconomic deprivation: an observational study of the prevalence of comorbidity in general practice. *Eur J Gen Pract.* 2004;10(1):24-26.
5. Macleod U, Mitchell E. Comorbidity in general practice. *Practitioner.* 2005;249(1669):282-284.
6. Schellevis FG, van der Velden J, van de Lisdonk E, van Eijk JT, van Weel C. Comorbidity of chronic diseases in general practice. *J Clin Epidemiol.* 1993;46(5):469-473.
7. Schoenberg NE, Kim H, Edwards W, Fleming ST. Burden of common multiple-morbidity constellations on out-of-pocket medical expenditures among older adults. *Gerontologist.* 2007;47(4):423-437.
8. Polliack MR, Shavitt N, Schneider M. The prevalence of long-term illness in a family practice. *J R Coll Gen Pract.* 1973;23(136):770-775.
9. Yu W, Ravelo A, Wagner TH, et al. Prevalence and costs of chronic conditions in the VA health care system. *Med Care Res Rev.* 2003;60(3)(Suppl):146S-167S.
10. Costa GR, Berjón MF, Mochales JA, Maleras RG, Laso AR, Vasallo MD. Epidemiological features of comorbidity and its influence on the use of health services from Health Survey Madrid 2007, Spain. *Rev Esp Salud Publica.* 2009;83(6):835-846.
11. Coulehan JLS, Schulberg HC, Block MR, Madonia MJ, Rodriguez E. Treating depressed primary care patients improves their physical, mental, and social functioning. *Arch Intern Med.* 1997;157(10):1113-1120.
12. Rose AT. Chronic illness in a general practice. *Fam Pract.* 1984;1(3):162-167.
13. Andresen EM, Bowley N, Rothenberg BM, Panzer R, Katz P. Test-retest performance of a mailed version of the Medical Outcomes Study 36-Item Short-Form Health Survey among older adults. *Med Care.* 1996;34(12):1165-1170.
14. Wolff JL, Starfield B, Anderson G. Prevalence, expenditures, and complications of multiple chronic conditions in the elderly. *Arch Intern Med.* 2002;162(20):2269-2276.
15. Shadmi E, Boyd CM, Hsiao CJ, Sylvia ML, Schuster AB, Boulton C. Morbidity and older persons' perceptions of the quality of their primary care. *J Am Geriatr Soc.* 2006;54(2):330-334.
16. Sylvia ML, Shadmi E, Hsiao CJ, Boyd CM, Schuster AB, Boulton C. Clinical features of high-risk older persons identified by predictive modeling. *Dis Manag.* 2006;9(1):56-62.
17. Fortin M, Lapointe L, Hudon C, Vanasse A. Multimorbidity is common to family practice: is it commonly researched? *Can Fam Physician.* 2005;51:244-245
18. Schoenberg NE, Kim H, Edwards W, Fleming ST. Burden of common multiple-morbidity constellations on out-of-pocket medical expenditures among older adults. *Gerontologist.* 2007;47(4):423-437. [duplicate]
19. Britt HC, Harrison CM, Miller GC, Knox SA. Prevalence and patterns of multimorbidity in Australia. *Med J Aust.* 2008;189(2):72-77.
20. Yates WR, Mitchell J, John Rush A, et al. Clinical features of depression in outpatients with and without co-occurring general medical conditions in STAR\*D: confirmatory analysis. *Prim Care Companion J Clin Psychiatry.* 2007;9(1):7-15.
21. Parkerson GR Jr, Hammond WE, Yarnall KS. Feasibility and potential clinical usefulness of a computerized severity of illness measure. *Arch Fam Med.* 1994;3(11):968-974.
22. Woo EK, Han C, Jo SA, et al. Morbidity and related factors among elderly people in South Korea: results from the Ansan Geriatric (AGE) cohort study. *BMC Public Health.* 2007;7:10.
23. Cornoni-Huntley JC, Foley DJ, Guralnik JM. Co-morbidity analysis: a strategy for understanding mortality, disability and use of health care facilities of older people. *Int J Epidemiol.* 1991;20(Suppl 1):S8-S17.
24. Cesari M, Onder G, Russo A, et al. Comorbidity and physical function: Results from the aging and longevity study in the sirente geographic area (iSIRENTE Study). *Gerontology.* 2006;52(1):24-32.
25. van den Akker M, Buntinx F, Metsemakers JF, Roos S, Knottnerus JA. Multimorbidity in general practice: prevalence, incidence, and determinants of co-occurring chronic and recurrent diseases. *J Clin Epidemiol.* 1998;51(5):367-375.
26. Tang J, Wan JY, Bailey JE. Performance of comorbidity measures to predict stroke and death in a community-dwelling, hypertensive Medicaid population. *Stroke.* 2008;39(7):1938-1944.
27. Grimby A, Svanborg A. Morbidity and health-related quality of life among ambulant elderly citizens. *Aging (Milano).* 1997;9(5):356-364.
28. Engström SG, Carlsson L, Ostgren CJ, Nilsson GH, Borgquist LA. The importance of comorbidity in analysing patient costs in Swedish primary care. *BMC Public Health.* 2006;6:36.
29. Eachus J, Williams M, Chan P, et al. Deprivation and cause specific morbidity: evidence from the Somerset and Avon survey of health. *BMJ.* 1996;312(7026):287-292.
30. Loza E, Rodriquel L, Carmona A. EPISER Group. Multimorbidity: prevalence, effect on quality of life and daily functioning, and variation of this effect when one condition is a rheumatic disease. *Semin Arthritis Rheum.* 2009;38(4):312-319.
31. van den Akker M, Buntinx F, Metsemakers JF, Knottnerus JA. Marginal impact of psychosocial factors on multimorbidity: results of an explorative nested case-control study. *Soc Sci Med.* 2000;50(11):1679-1693.
32. Reid R, Evans R, Barer M, et al. Conspicuous consumption: characterizing high users of physician services in one Canadian province. *J Health Serv Res Policy.* 2003;8(4):215-224.
33. von Strauss E, Fratiglioni L, Viitanen M, Forsell Y, Winblad B. Morbidity and comorbidity in relation to functional status: a community-based study of the oldest old (90+ years). *J Am Geriatr Soc.* 2000;48(11):1462-1469.

34. van den Akker M, Buntinx F, Metsemakers JF, van der Aa M, Knottnerus JA. Psychosocial patient characteristics and GP-registered chronic morbidity: a prospective study. *J Psychosom Res.* 2001;50(2):95-102.
35. Naughton C, Bennett K, Feely J. Prevalence of chronic disease in the elderly based on a national pharmacy claims database. *Age Ageing.* 2006;35(6):633-636.
36. Daniel GW, Malone DC. Characteristics of older adults who meet the annual prescription drug expenditure threshold for medicare medication therapy management programs. *J Manag Care Pharm.* 2007;13(2):142-154.
37. Millett C, Bottle A, Ng A, et al. Pay for performance and the quality of diabetes management in individuals with and without co-morbid medical conditions. *J R Soc Med.* 2009;102(9):369-377.
38. Perkins AJK, Kroenke K, Unützer J, et al. Common comorbidity scales were similar in their ability to predict health care costs and mortality. *J Clin Epidemiol.* 2004;57(10):1040-1048.
39. Clark DO, Von Korff M, Saunders K, Baluch WM, Simon GE. A chronic disease score with empirically derived weights. *Med Care.* 1995;33(8):783-795.
40. Fishman PA, Goodman MJ, Hornbrook MC, Meenan RT, Bachman DJ, O'Keefe Rosetti MC. Risk adjustment using automated ambulatory pharmacy data: the RxRisk model. *Med Care.* 2003;41(1):84-99.
41. Charlson ME, Peterson JC, Syat BL, et al. Outcomes of community-based social service interventions in homebound elders. *Int J Geriatr Psychiatry.* 2008;23(4):427-432.
42. Loza E, Lopez-Gomez JM, Abasolo L, Maese J, Carmona L, Batlle-Gualda E; Artrocad Study Group. Economic burden of knee and hip osteoarthritis in Spain. *Arthritis Rheum.* 2009;61(2):158-165.
43. Parkerson GR Jr, Harrell FE Jr, Hammond WE, Wang XQ. Characteristics of adult primary care patients as predictors of future health services charges. *Med Care.* 2001;39(11):1170-1181.
44. Sicras-Mainar A. Retrospective application of adjusted clinical groups (ACGs) at a primary care centre. *Aten Primaria.* 2006;37(8):439-445.
45. Cowen ME, Dusseau DJ, Toth BG, Guisinger C, Zodet MW, Shyr Y. Casemix adjustment of managed care claims data using the clinical classification for health policy research method. *Med Care.* 1998;36(7):1108-1113.
46. Zielinski A, Kronogard M, Lenhoff H, Halling A. Validation of ACG Case-mix for equitable resource allocation in Swedish primary health care. *BMC Public Health.* 2009;9:347.
47. Aguado A, Guinó E, Mukherjee B, et al. Variability in prescription drug expenditures explained by adjusted clinical groups (ACG) case-mix: a cross-sectional study of patient electronic records in primary care. *BMC Health Serv Res.* 2008;8:53.
48. Halling A, Fridh G, Ovhed I. Validating the Johns Hopkins ACG Case-Mix System of the elderly in Swedish primary health care. *BMC Public Health.* 2006; 6:171.
49. Parkerson GR Jr, Broadhead WE, Tse CK. The Duke Severity of Illness Checklist (DUSOI) for measurement of severity and comorbidity. *J Clin Epidemiol.* 1993;46(4):379-393.
50. Juncosa S, Bolibar B, Roset M, Tomas R. Performance of an ambulatory casemix measurement system in primary care in Spain: Ambulatory care groups (ACGs). *Eur J Public Health.* 1999;9(1):27-35.
51. Chang W, McCracken SB. Applying case mix adjustment in profiling primary care physician performance. *J Health Care Finance.* 1996;22(4):1-9.
52. Tucker AM, Weiner JP, Honigfeld S, Parton RA. Profiling primary care physician resource use: examining the application of case mix adjustment. *J Ambul Care Manage.* 1996;19(1):60-80.
53. Walter-Ginzburg A, Chetrit A, Medina C, Blumstein T, Gindin J, Modan B. Physician visits, emergency room utilization, and overnight hospitalization in the old-old in Israel: the cross-sectional and longitudinal aging study (CALAS). *J Am Geriatr Soc.* 2001;49(5):549-556.
54. Kravitz RL, Greenfield S, Rogers W, et al. Differences in the mix of patients among medical specialties and systems of care. Results from the medical outcomes study. *JAMA.* 1992;267(12):1617-1623.
55. Bernatsky S, Panopolis P, Hudson M, et al.; Canadian Scleroderma Research Group. Demographic and clinical factors associated with physician service use in systemic sclerosis. *J Rheumatol.* 2009;36(1):96-98.
56. Alander T, Svärdsudd K, Agréus L. Functional gastrointestinal disorder is associated with increased non-gastrointestinal healthcare consumption in the general population. *Int J Clin Pract.* 2008;62(2):234-240.
57. Westert GP, Satariano WA, Schellevis FG, van den Bos GA. Patterns of comorbidity and the use of health services in the Dutch population. *Eur J Public Health.* 2001;11(4):365-372.
58. Selim AJ, Fincke G, Ren XS, et al. Comorbidity assessments based on patient report: results from the Veterans Health Study. *J Ambul Care Manage.* 2004;27(3):281-295.
59. Formiga F, Ferrer A, Perez-Castejon J, Olmedo C. Relación entre la pérdida sensorial y la capacidad funcional en personas mayores de 89 años. Estudio NonaSantfeliu [Relationship between sensory impairment and functional status in nonagenarians. The NonaSantfeliu study]. *Rev Esp Geriatr Gerontol.* 2006;41(5):258-263.
60. Ferrari S, Galeazzi GM, Mackinnon A, Rigatelli M. Frequent attenders in primary care: impact of medical, psychiatric and psychosomatic diagnoses. *Psychother Psychosom.* 2008;77(5):306-314.
61. van Bussel B, Pijpers E, Ferreira I, Castermans P, Kruseman AN. Polymorbidity in diabetes in older people: consequences for care and vocational training. *Postgrad Med J.* 2007;83(986):763-767.
62. Dominick KL, Dudley TK, Coffman CJ, Bosworth HB. Comparison of three comorbidity measures for predicting health service use in patients with osteoarthritis. *Arthritis Rheum.* 2005;53(5):666-672.
63. Mayo NE, Nadeau L, Levesque L, Miller S, Poissant L, Tamblyn R. Does the addition of functional status indicators to case-mix adjustment indices improve prediction of hospitalization, institutionalization, and death in the elderly? *Med Care.* 2005;43(12):1194-1202.
64. Von Korff M, Wagner EH, Saunders K. A chronic disease score from automated pharmacy data. *J Clin Epidemiol.* 1992;45(2):197-203.

65. Putnam K, Buist DS, Fishman P, et al. Chronic disease score as a predictor of hospitalization. *Epidemiol.* 2002;13(3):340-346.
66. Charlson ME, Charlson RE, Peterson JC, Marinopoulos SS, Briggs WM, Hollenberg JP. The Charlson comorbidity index is adapted to predict costs of chronic disease in primary care patients. *J Clin Epidemiol.* 2008;61(12):1234-1240.
67. Dorr DA, Jones SS, Burns L, et al. Use of health-related, quality-of-life metrics to predict mortality and hospitalizations in community-dwelling seniors. *J Am Geriatr Soc.* 2006;54(4):667-673.
68. Fuchs Z, Blumstein T, Novikov I, et al. Morbidity, comorbidity, and their association with disability among community-dwelling oldest-old in Israel. *J Gerontol A Biol Sci Med Sci.* 1998;53(6):M447-M455.
69. Walter LC, Lindquist K, Nugent S, et al. Impact of age and comorbidity on colorectal cancer screening among older veterans. *Ann Intern Med.* 2009;150(7):465-473.
70. Kiefe CI, Funkhouser E, Fouad MN, May DS. Chronic disease as a barrier to breast and cervical cancer screening. *J Gen Intern Med.* 1998;13(6):357-365.
71. Fisher DA, Galanko J, Dudley TK, Shaheen NJ. Impact of comorbidity on colorectal cancer screening in the veterans healthcare system. *Clin Gastroenterol Hepatol.* 2007;5(8):991-996.
72. Weiner JP, Starfield BH, Powe NR, Stuart ME, Steinwachs DM. Ambulatory care practice variation within a Medicaid program. *Health Serv Res.* 1996;30(6):751-770.
73. Sullivan CO, Omar RZ, Forrest CB, Majeed A. Adjusting for case mix and social class in examining variation in home visits between practices. *Fam Pract.* 2004;21(4):355-363.
74. Starfield B, Weiner J, Mumford L, Steinwachs D. Ambulatory care groups: a categorization of diagnoses for research and management. *Health Serv Res.* 1991;26(1):53-74.
75. Starfield B, Lemke KW, Herbert R, Pavlovich WD, Anderson G. Comorbidity and the use of primary care and specialist care in the elderly. *Ann Fam Med.* 2005;3(3):215-222.
76. Sullivan CO, Omar RZ, Ambler G, Majeed A. Case-mix and variation in specialist referrals in general practice. *Br J Gen Pract.* 2005;55(516):529-533.
77. Orueta JF, Lopez-De-Munain J, Báez K, Aiarzaguena JM, Aranguren JI, Pedrero E. Application of the ambulatory care groups in the primary care of a European national health care system: does it work? *Med Care.* 1999;37(3):238-248.
78. Higashi T, Wenger NS, Adams JL, et al. Relationship between number of medical conditions and quality of care. *N Engl J Med.* 2007;356(24):2496-2504.
79. Min LC, Wenger NS, Fung C, et al. Multimorbidity is associated with better quality of care among vulnerable elders. *Med Care.* 2007;45(6):480-488.
80. Noël PH, Parchman ML, Williams JW Jr, et al. The challenges of multimorbidity from the patient perspective. *J Gen Intern Med.* 2007;22(Suppl 3):419-424.
81. Parchman ML, Noël PH, Lee S. Primary care attributes, health care system hassles, and chronic illness. *Med Care.* 2005;43(11):1123-1129.
82. Singh JA, Hodges JS, Asch SM. Opportunities for improving medication use and monitoring in gout. *Ann Rheum Dis.* 2009;68(8):1265-1270.
83. Fillenbaum GG, Pieper CF, Cohen HJ, Cornoni-Huntley JC, Guralnik JM. Comorbidity of five chronic health conditions in elderly community residents: determinants and impact on mortality. *J Gerontol A Biol Sci Med Sci.* 2000;55(2):M84-M89.
84. Duff K, Mold JW, Gidron Y. Cognitive functioning predicts survival in the elderly. *J Clin Exp Neuropsychol.* 2009;31(1):90-95.
85. Eakin EG, Youlden DR, Baade PD, et al. Health status of long-term cancer survivors: results from an Australian population-based sample. *Cancer Epidemiol Biomarkers Prev.* 2006;15(10):1969-1976.
86. Di Bari M, Virgilio A, Matteuzzi D, et al. Predictive validity of measures of comorbidity in older community dwellers: the Insufficienza Cardiaca negli Anziani Residenti a Dicomano Study. *J Am Geriatr Soc.* 2006;54(2):210-216.
87. Schneeweiss S, Wang PS, Avorn J, Maclure M, Levin R, Glynn RJ. Consistency of performance ranking of comorbidity adjustment scores in Canadian and U.S. utilization data. *J Gen Intern Med.* 2004;19(5 Pt 1):444-450.
88. Menotti A, Mulder I, Nissinen A, Giampaoli S, Feskens EJ, Kromhout D. Prevalence of morbidity and multimorbidity in elderly male populations and their impact on 10-year all-cause mortality: The FINE study (Finland, Italy, Netherlands, Elderly). *J Clin Epidemiol.* 2001;54(7):680-686.
89. Johnson ML, El-Serag HB, Tran TT, Hartman C, Richardson P, Abraham NS. Adapting the Rx-Risk-V for mortality prediction in outpatient populations. *Med Care.* 2006;44(8):793-797.
90. Yan Y, Birman-Deych E, Radford MJ, Nilasena DS, Gage BF. Comorbidity indices to predict mortality from Medicare data: results from the national registry of atrial fibrillation. *Med Care.* 2005;43(11):1073-1077.
91. Rius C, Rodriguez-Sanz M, Fernandez E. Comorbidity index was successfully validated among men but not in women. *J Clin Epidemiol.* 2008;61(8):798-802.
92. Wang R, Gross CP, Halene S, Ma X. Comorbidities and survival in a large cohort of patients with newly diagnosed myelodysplastic syndromes. *Leuk Res.* 2009;33(12):1594-1598.
93. McCowan C, Kidd B, Fahey T. Factors associated with mortality in Scottish patients receiving methadone in primary care: retrospective cohort study. *BMJ.* 2009;338:b2225.
94. Andrews G, Henderson S, Hall W. Prevalence, comorbidity, disability and service utilisation. Overview of the Australian National Mental Health Survey. *Br J Psychiatry.* 2001;178:145-153.
95. Cigolle CT, Langa KM, Kabeto MU, Tian Z, Blaum CS. Geriatric conditions and disability: the Health and Retirement Study. *Ann Intern Med.* 2007;147(3):156-164.
96. Marrie RA, Horwitz R, Cutter G, Tyry T, Campagnolo D, Vollmer T. Comorbidity delays diagnosis and increases disability at diagnosis in MS. *Neurology.* 2009;72(2):117-124.

97. Ayis S, Dieppe P. The natural history of disability and its determinants in adults with lower limb musculoskeletal pain. *J Rheumatol*. 2009;36(3):583-591.
98. Schmitz N, Wang J, Malla A, Lesage A. Joint effect of depression and chronic conditions on disability: results from a population-based study. *Psychosom Med*. 2007;69(4):332-338.
99. Rigler SK, Studenski S, Wallace D, Reker DM, Duncan PW. Co-morbidity adjustment for functional outcomes in community-dwelling older adults. *Clin Rehabil*. 2002;16(4):420-428.
100. Kriegsman DM, Deeg DJ, Stalman WA. Comorbidity of somatic chronic diseases and decline in physical functioning: the Longitudinal Aging Study Amsterdam. *J Clin Epidemiol*. 2004;57(1):55-65.
101. den Elzen WP, Willems JM, Westendorp RGJ, de Craen AJM, Assendelft WJJ, Gussekloo J. Effect of anemia and comorbidity on functional status and mortality in old age: results from the Leiden 85-plus Study. *CMAJ*. 2009;181(3-4):151-157.
102. Rockwood K, Howlett SE, MacKnight C, et al. Prevalence, attributes, and outcomes of fitness and frailty in community-dwelling older adults: report from the Canadian study of health and aging. *J Gerontol A Biol Sci Med Sci*. 2004;59(12):1310-1317.
103. Alvarado BE, Zunzunegui MV, Béland F, Bamvita JM. Life course social and health conditions linked to frailty in Latin American older men and women. *J Gerontol A Biol Sci Med Sci*. 2008;63(12):1399-1406.
104. Shumway-Cook A, Ciol MA, Hoffman J, Dudgeon BJ, Yorkston K, Chan L. Falls in the Medicare population: incidence, associated factors, and impact on health care. *Phys Ther*. 2009;89(4):324-332.
105. Gassmann KG, Rupprecht R, IZG study group. Dizziness in an older community dwelling population: a multifactorial syndrome. *J Nutr Health Aging*. 2009;13(3):278-282.
106. Reyes-Gibby CC, Aday LA, Todd KH, Cleeland CS, Anderson KO. Pain in aging community-dwelling adults in the United States: non-Hispanic whites, non-Hispanic blacks, and Hispanics. *J Pain*. 2007;8(1):75-84.
107. Penn DM, Fischer JG, Sun Lee J, Hausman DB, Johnson MA. High BMI and waist circumference are associated with a high prevalence of comorbidities in older Americans Act programs in Georgia senior centers. *J Nutr Health Aging*. 2009;13(9):827-832.
108. Globe DR, Varma R, Torres M, Wu J, Klein R, Azen SP; Los Angeles Latino Eye Study Group. Self-reported comorbidities and visual function in a population-based study: the Los Angeles Latino Eye Study. *Arch Ophthalmol*. 2005;123(6):815-821.
109. Marengoni A, von Strauss E, Rizzuto D, Winblad B, Fratiglioni L. The impact of chronic multimorbidity and disability on functional decline and survival in elderly persons. A community-based, longitudinal study. *J Intern Med*. 2009;265(2):288-295.
110. Miller RR, Zhang Y, Silliman RA, et al. Effect of medical conditions on improvement in self-reported and observed functional performance of elders. *J Am Geriatr Soc*. 2004;52(2):217-223.
111. Roy-Byrne P, Stein MB, Russo J, et al. Medical illness and response to treatment in primary care panic disorder. *Gen Hosp Psychiatry*. 2005;27(4):237-243.
112. Miller MD, Paradis CF, Houck PR, et al. Rating chronic medical illness burden in geropsychiatric practice and research: application of the Cumulative Illness Rating Scale. *Psychiatry Res*. 1992;41(3):237-248.
113. Duff K, Mold JW, Roberts MM, McKay SL. Medical burden and cognition in older patients in primary care: selective deficits in attention. *Arch Clin Neuropsychol*. 2007;22(5):569-575.
114. Lyketsos CG, Toone L, Tschanz J, et al.; Cache County Study Group. Population-based study of medical comorbidity in early dementia and "cognitive impairment, no dementia (CIND)": association with functional and cognitive impairment: The Cache County Study. *Am J Geriatr Psychiatry*. 2005;13(8):656-664.
115. Koike AK, Unützer J, Wells KB. Improving the care for depression in patients with comorbid medical illness. *Am J Psychiatry*. 2002;159(10):1738-1745.
116. Chuan SK, Kumar R, Matthew N, Heok KE, Pin NT. Subsyndromal depression in old age: clinical significance and impact in a multi-ethnic community sample of elderly Singaporeans. *Int Psychogeriatr*. 2008;20(1):188-200.
117. Kurland BF, Gill TM, Patrick DL, Larson EB, Phelan EA. Longitudinal change in positive affect in community-dwelling older persons. *J Am Geriatr Soc*. 2006;54(12):1846-1853.
118. Penninx B, Beekman A, Kriegsman DMW, Boeke A, van Eijk JT, Deeg D. Psychological status among elderly people with chronic diseases: does type of disease play a part? *J Psychosom Res*. 1996;40(5):521-534.
119. Bogner HR, Cary MS, Bruce ML, et al. The role of medical comorbidity in outcome of major depression in primary care: the PROSPECT study. *Am J Geriatr Psychiatry*. 2005;13(10):861-868.
120. Keles H, Ekici A, Ekici M, Bulcun E, Altinkaya V. Effect of chronic diseases and associated psychological distress on health-related quality of life. *Intern Med J*. 2007;37(1):6-11.
121. Forman-Hoffman VL, Richardson KK, Yankey JW, Hillis SL, Wallace RB, Wolinsky FD. Impact of functional limitations and medical comorbidity on subsequent weight changes and increased depressive symptoms in older adults. *J Aging Health*. 2008;20(4):367-384.
122. Koopmans GT, Lamers LM. Chronic conditions, psychological distress and the use of psychoactive medications. *J Psychosom Res*. 2000;48(2):115-123.
123. Foley D, Ancoli-Israel S, Britz P, Walsh J. Sleep disturbances and chronic disease in older adults: results of the 2003 National Sleep Foundation Sleep in America Survey. *J Psychosom Res*. 2004;56(5):497-502.
124. Depp CA, Davis CE, Mittal D, Patterson TL, Jeste DV. Health-related quality of life and functioning of middle-aged and elderly adults with bipolar disorder. *J Clin Psychiatry*. 2006;67(2):215-221.
125. Fortin M, Bravo G, Hudon C, Lapointe L, Dubois MF, Almirall J. Psychological distress and multimorbidity in primary care. *Ann Fam Med*. 2006;4(5):417-422.
126. Harpole LHW, Williams JW Jr, Olsen MK, et al. Improving depression outcomes in older adults with comorbid medical illness. *Gen Hosp Psychiatry*. 2005;27(1):4-12.



127. Schubert CC, Boustani M, Callahan CM, et al. Comorbidity profile of dementia patients in primary care: are they sicker? *J Am Geriatr Soc.* 2006;54(1):104-109.
128. Ani C, Bazargan M, Hindman D, Bell D, Rodriguez M, Baker RS. Comorbid chronic illness and the diagnosis and treatment of depression in safety net primary care settings. *J Am Board Fam Med.* 2009;22(2):123-135.
129. Barsky AJ, Orav EJ, Bates DW. Somatization increases medical utilization and costs independent of psychiatric and medical comorbidity. *Arch Gen Psychiatry.* 2005;62(8):903-910.
130. Harris AM, Orav EJ, Bates DW, Barsky AJO. Somatization increases disability independent of comorbidity. *J Gen Intern Med.* 2009;24(2):155-161.
131. Malone DC, McLaughlin TP, Wahl PM, et al. Burden of Alzheimer's disease and association with negative health outcomes. *Am J Manag Care.* 2009;15(8):481-488.
132. Callahan CM, Kesterson JG, Tierney WM. Association of symptoms of depression with diagnostic test charges among older adults. *Ann Intern Med.* 1997;126(6):426-432.
133. Lyness JM, Niculescu A, Tu X, Reynolds CF III, Caine ED. The relationship of medical comorbidity and depression in older, primary care patients. *Psychosomatics.* 2006;47(5):435-439.
134. Coulehan JL, Schulberg HC, Block MR, Janosky JE, Arena VC. Medical comorbidity of major depressive disorder in a primary medical practice. *Arch Intern Med.* 1990;150(11):2363-2367.
135. Bayliss EA, Ellis JL, Steiner JF. Subjective assessments of comorbidity correlate with quality of life health outcomes: initial validation of a comorbidity assessment instrument. *Health Qual Life Outcomes.* 2005;3:51-58.
136. Byles J, D'Ester C, Parkinson L, O'Connell R, Treloar C. Single index of multimorbidity did not predict multiple outcomes. *J Clin Epidemiol* 2005; 58(10):997.
137. Bayliss EA, Ellis JL, Steiner JF, Main DS. Initial validation of an instrument to identify barriers to self-management for persons with co-morbidities. *Chronic Illn.* 2005;1(4):315-320.
138. Salaffi F, Carotti M, Stancati A, Grassi W. Health-related quality of life in older adults with symptomatic hip and knee osteoarthritis: a comparison with matched healthy controls. *Aging Clin Exp Res.* 2005;17(4):255-263.
139. van Manen JG, Bindels PJ, Dekker EW, et al. Added value of co-morbidity in predicting health-related quality of life in COPD patients. *Respir Med.* 2001;95(6):496-504.
140. Wensing M, Vingerhoets E, Grol R. Functional status, health problems, age and comorbidity in primary care patients. *Qual Life Res.* 2001;10(2):141-148.
141. Singh JA. Effect of comorbidity on quality of life of male veterans with prevalent primary total knee arthroplasty. *Clin Rheumatol.* 2009;28(9):1083-1089.
142. Noël PH, Williams JW Jr, Unützer J, et al. Depression and comorbid illness in elderly primary care patients: impact on multiple domains of health status and well-being. *Ann Fam Med.* 2004;2(6):555-562.
143. Ose D, Wensing M, Szecsenyi J, Joos S, Hermann K, Miksch A. Impact of primary care-based disease management on the health-related quality of life in patients with type 2 diabetes and comorbidity. *Diabetes Care.* 2009;32(9):1594-1596.
144. Baune BT, Adrian I, Jacobi F. Medical disorders affect health outcome and general functioning depending on comorbid major depression in the general population. *J Psychosom Res.* 2007;62(2):109-118.
145. John R, Kerby DS, Hennessy CH. Patterns and impact of comorbidity and multimorbidity among community-resident American Indian elders. *Gerontologist.* 2003;43(5):649-660.
146. Yun YH, Kim SH, Lee KM, Park SM, Kim YM. Age, sex, and comorbidities were considered in comparing reference data for health-related quality of life in the general and cancer populations. *J Clin Epidemiol.* 2007;60(11):1164-1175.
147. Mittmann N, Trakas K, Risebrough N, Liu BA. Utility scores for chronic conditions in a community-dwelling population. *Pharmacoeconomics.* 1999;15(4):369-376.
148. Vitry A, Wong SA, Roughead EE, Ramsay E, Barratt J. Validity of medication-based co-morbidity indices in the Australian elderly population. *Aust N Z J Public Health.* 2009;33(2):126-130.
149. Bayliss EA, Ellis JL, Steiner JF. Barriers to self-management and quality-of-life outcomes in seniors with multimorbidities. *Ann Fam Med.* 2007;5(5):395-402.
150. Damian J, Ruigomez A, Pastor V, Martin-Moreno JM. Determinants of self assessed health among Spanish older people living at home. *J Epidemiol Community Health.* 1999;53(7):412-416.
151. Charlson ME, Pompei P, Ales KL, MacKenzie CR. A new method of classifying prognostic comorbidity in longitudinal studies: development and validation. *J Chronic Dis.* 1987;40(5):373-383.
152. Bayliss EA, Bayliss MS, Ware JE Jr, Steiner JF. Predicting declines in physical function in persons with multiple chronic medical conditions: what we can learn from the medical problem list. *Health Qual Life Outcomes.* 2004;2:47.
153. Kadam UT, Croft PR; North Staffordshire GP Consortium Group. Clinical multimorbidity and physical function in older adults: a record and health status linkage study in general practice. *Fam Pract.* 2007;24(5):412-419.
154. Deyo RA, Cherkin DC, Ciol MA. Adapting a clinical comorbidity index for use with ICD-9-CM administrative databases. *J Clin Epidemiol.* 1992;45(6):613-619.
155. International Research Community on Multimorbidity. <http://www.usherbrooke.ca/crmcspl/en/international-research-community-on-multimorbidity/>.
156. Guerra CE, Shea JA. Health literacy and perceived health status in Latinos and African Americans. *Ethn Dis.* 2007;17(2):305-312.
157. Lima MG, de Azevedo Barros B, Cesar CLG, Goldbaum M, Carandina L, Ciconelli RM. Impact of chronic disease on quality of life among the elderly in the state of Sao Paulo, Brazil: a population-based study. *Pan Am J Public Health.* 2009;25(4):314-321.
158. Lu W, Cui Y, Chen X, et al. Changes in quality of life among breast cancer patients three years post-diagnosis. *Breast Cancer Res Treat.* 2009;114(2):357-369.

159. Heller DA, Ahern FM, Pringle KE, Brown TV. Among older adults, the responsiveness of self-rated health to changes in Charlson comorbidity was moderated by age and baseline comorbidity. *J Clin Epidemiol.* 2009;62(2):177-187.
160. Schnell-Hoehn KN, Naimark BJ, Tate RB. Determinants of self-care behaviors in community-dwelling patients with heart failure. *J Cardiovasc Nurs.* 2009;24(1):40-47.
161. Kerr EA, Heisler M, Krein SL, et al. Beyond comorbidity counts: how do comorbidity type and severity influence diabetes patients' treatment priorities and self-management? *J Gen Intern Med.* 2007;22(12):1635-1640.
162. Carpenter CL, Ganz PA, Bernstein L. Complementary and alternative therapies among very long-term breast cancer survivors. *Breast Cancer Res Treat.* 2009;116(2):387-396.
163. Shin JK, Kim KW, Park JH, et al. Impacts of poor social support on general health status in community-dwelling Korean elderly: the results from the Korean longitudinal study on health and aging. *Psychiatry Investig.* 2008;5(3):155-162.
164. Chrischilles E, Rubenstein L, Van Gilder R, Voelker M, Wright K, Wallace R. Risk factors for adverse drug events in older adults with mobility limitations in the community setting. *J Am Geriatr Soc.* 2007;55(1):29-34.
165. Field TS, Mazor KM, Briesacher B, Debellis KR, Gurwitz JH. Adverse drug events resulting from patient errors in older adults. *J Am Geriatr Soc.* 2007;55(2):271-276.
